# Supplementary material for: New insight into N2 adsorption and ion-exchange features of CuMFI with different Si/Al ratios
Source: Royal Society of Chemistry journal article supplement (doi:10.1039/b703846a), 2007-01-01
Supplement: b703846a.pdf [file b703846a.pdf]

## Electronic Supplementary Information

### **New insight into N<sub>2</sub> adsorption and ion-exchange features of CuMFI with different Si/Al ratios**

**Atsushi Itadani,<sup>a</sup> Masashi Tanaka,<sup>ab</sup> Yasushige Kuroda<sup>\*b</sup> and Mahiko Nagao<sup>ab</sup>**

<sup>a</sup> *Research Laboratory for Surface Science, Faculty of Science, Okayama University,  
Tsushima-naka, Okayama 700-8530, Japan*

<sup>b</sup> *Department of Fundamental Material Science, Graduate School of Natural Science and  
Technology, Okayama University, Tsushima-naka, Okayama 700-8530, Japan*

Corresponding author (Y. Kuroda):

Fax: +81-86-251-7853

Tel.: +81-86-251-7844

E-mail: kuroda@cc.okayama-u.ac.jp

**Table 1** Preparation conditions of CuMFI and their notation

| Cu sources                                         | Cu concentration<br>(mol dm <sup>-3</sup> ) | Temperature<br>(K) | Exchange operation<br>(times) | Si/Al ratio | Ion-exchange level<br>(%) | Notation          |
|----------------------------------------------------|---------------------------------------------|--------------------|-------------------------------|-------------|---------------------------|-------------------|
| Cu(C <sub>2</sub> H <sub>5</sub> COO) <sub>2</sub> | 0.001                                       | 300                | 3                             | 11.9        | 12                        | CuMFI(P)-11.9-12  |
| Cu(C <sub>2</sub> H <sub>5</sub> COO) <sub>2</sub> | 0.01                                        | 300                | 2                             | 11.9        | 68                        | CuMFI(P)-11.9-68  |
| Cu(C <sub>2</sub> H <sub>5</sub> COO) <sub>2</sub> | 0.01                                        | 300                | 10                            | 11.9        | 109                       | CuMFI(P)-11.9-109 |
| Cu(CH <sub>3</sub> COO) <sub>2</sub>               | 0.01                                        | 300                | 4                             | 11.9        | 105                       | CuMFI(A)-11.9-105 |
| CuCl <sub>2</sub>                                  | 0.03                                        | 363                | 1                             | 11.9        | 74                        | CuMFI(C)-11.9-74  |
| CuCl <sub>2</sub>                                  | 0.3                                         | 363                | 1                             | 11.9        | 107                       | CuMFI(C)-11.9-107 |
| Cu(C <sub>2</sub> H <sub>5</sub> COO) <sub>2</sub> | 0.01                                        | 300                | 2                             | 19.8        | 72                        | CuMFI(P)-19.8-72  |
| Cu(C <sub>2</sub> H <sub>5</sub> COO) <sub>2</sub> | 0.01                                        | 300                | 20                            | 19.8        | 109                       | CuMFI(P)-19.8-109 |
| Cu(CH <sub>3</sub> COO) <sub>2</sub>               | 0.01                                        | 300                | 20                            | 19.8        | 100                       | CuMFI(A)-19.8-100 |
| CuCl <sub>2</sub>                                  | 0.3                                         | 363                | 10                            | 19.8        | 113                       | CuMFI(C)-19.8-113 |
| Cu(C <sub>2</sub> H <sub>5</sub> COO) <sub>2</sub> | 0.005                                       | 300                | 1                             | 35.0        | 50                        | CuMFI(P)-35.0-50  |
| Cu(C <sub>2</sub> H <sub>5</sub> COO) <sub>2</sub> | 0.01                                        | 300                | 5                             | 35.0        | 105                       | CuMFI(P)-35.0-105 |
| Cu(CH <sub>3</sub> COO) <sub>2</sub>               | 0.01                                        | 300                | 4                             | 35.0        | 103                       | CuMFI(A)-35.0-103 |
| CuCl <sub>2</sub>                                  | 0.3                                         | 363                | 15                            | 35.0        | 132                       | CuMFI(C)-35.0-132 |
| Cu(C <sub>2</sub> H <sub>5</sub> COO) <sub>2</sub> | 0.001                                       | 300                | 8                             | 100         | 75                        | CuMFI(P)-100-75   |
| Cu(C <sub>2</sub> H <sub>5</sub> COO) <sub>2</sub> | 0.01                                        | 300                | 1                             | 100         | 102                       | CuMFI(P)-100-102  |
| Cu(CH <sub>3</sub> COO) <sub>2</sub>               | 0.01                                        | 300                | 1                             | 100         | 101                       | CuMFI(A)-100-101  |
| CuCl <sub>2</sub>                                  | 0.3                                         | 363                | 3                             | 100         | 90                        | CuMFI(C)-100-90   |
| CuCl <sub>2</sub>                                  | 0.3                                         | 363                | 5                             | 100         | 125                       | CuMFI(C)-100-125  |
| Cu(NO <sub>3</sub> ) <sub>2</sub>                  | 0.3                                         | 363                | 7                             | 100         | 73                        | CuMFI(N)-100-73   |

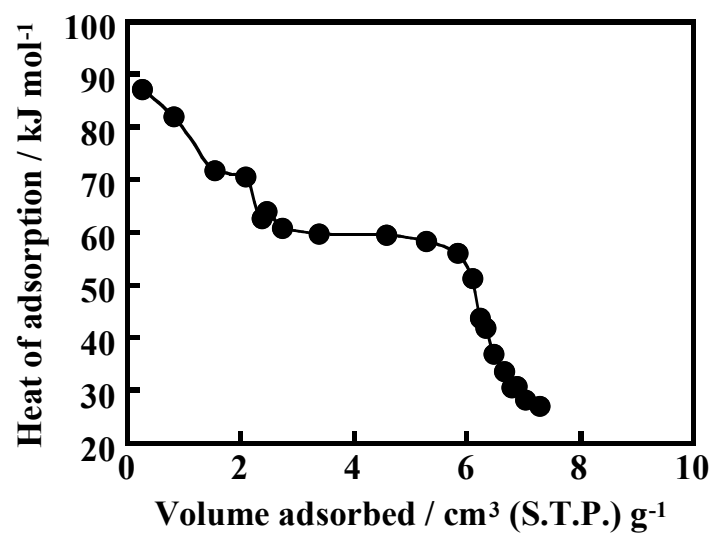

**Fig. ESI1** Differential heats of adsorption of N<sub>2</sub> at 301 K for CuMFI(P)-19.8-109.

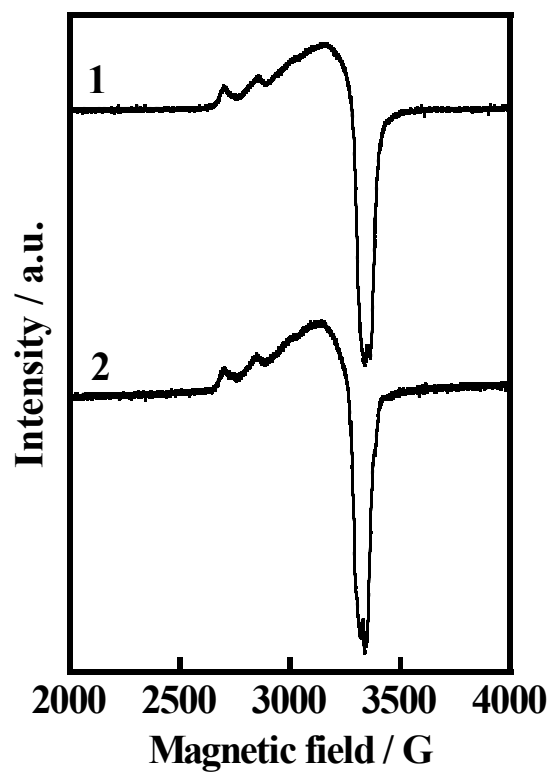

**Fig. ESI2** EPR spectra of CuMFI evacuated at r.t. in vacuo:  
(1) CuMFI(C)-35.0-132 and (2) CuMFI(N)-100-73.
